# Supplementary material for: Fructo-Oligosaccharides and Pectins Enhance Beneficial Effects of Raspberry Polyphenols in Rats with Nonalcoholic Fatty Liver
Source: PubMed Central journal article supplement (PMC8001257; doi:10.3390/nu13030833), 2021-03-03
Supplement: nutrients-13-00833-s001.pdf [file nutrients-13-00833-s001.pdf]

Table S1. Composition of the group-specific diets

| (g/100 g diet)           | Groups |       |       |       |
|--------------------------|--------|-------|-------|-------|
|                          | H      | HP    | HPF   | HPP   |
| Casein                   | 20     | 20    | 20    | 20    |
| DL-methionine            | 0.3    | 0.3   | 0.3   | 0.3   |
| Rapeseed oil             | 2      | 2     | 2     | 2     |
| Cholesterol              | 1      | 1     | 1     | 1     |
| Lard                     | 23     | 23    | 23    | 23    |
| Polyphenolic extract     | -      | 0.64  | 0.64  | 0.64  |
| Fructooligosaccharides   | -      | -     | 3     | -     |
| Pectin                   | -      | -     | -     | 3     |
| Saccharose               | 10     | 10    | 10    | 10    |
| Cellulose                | 3      | 3     | 3     | 3     |
| Corn starch              | 36     | 35.36 | 32.36 | 32.36 |
| Mineral mix <sup>1</sup> | 3.5    | 3.5   | 3.5   | 3.5   |
| Vitamin mix <sup>1</sup> | 1      | 1     | 1     | 1     |
| Choline chloride         | 0.2    | 0.2   | 0.2   | 0.2   |

H, control high-fat diet; HP, control high-fat diet enriched with raspberry polyphenol extract; HPF, control high-fat diet enriched with raspberry polyphenol extract and fructooligosaccharides; HPP, control high-fat diet enriched with raspberry polyphenol extract and pectin.

<sup>1</sup> Recommended level for the AIN-93G diet.

Supplemental Table 2. Basic chemical composition of raspberry polyphenol extract.

| Compound                  | [g/100 g]    |
|---------------------------|--------------|
| Basic compounds           |              |
| Dry matter (AOAC 940.26)  | 94.79 ± 0.18 |
| Protein (AOAC 920.152)    | 4.74 ± 0.45  |
| Fat (AOAC 930.09)         | 0.51 ± 0.04  |
| Ash                       | 2.11 ± 0.06  |
| TDF (AOAC 985.29; 991.42) | 0.00 ± 0.00  |
| IDF                       | 0.00 ± 0.00  |
| SDF                       | 0.00 ± 0.00  |

TDF, Total dietary fibre; ISD, insoluble dietary fibre SDF, soluble dietary fibre.

AOAC - Horwitz W, Latimer G.W. (2007) Official methods of analysis of the AOAC International, 2005, 18th edn. AOAC International, USA.
